# Supplementary material for: JNK-mediated disruption of bile acid homeostasis promotes intrahepatic cholangiocarcinoma
Source: PubMed Central journal article supplement — Proc Natl Acad Sci U S A. 2020 Jun 29;117(28):16492–9. doi: 10.1073/pnas.2002672117 (PMC7368313; doi:10.1073/pnas.2002672117), 2020-06-29

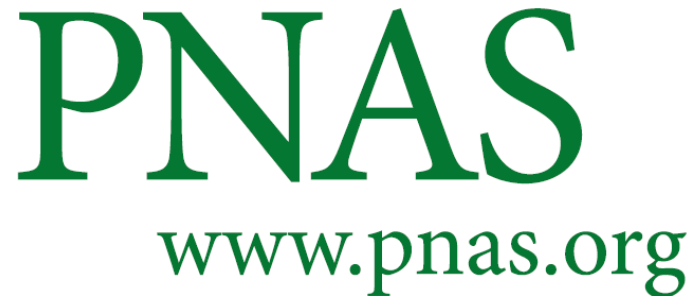

Supplementary Information for

**Hepatic JNK-mediated bile acid homeostasis regulates cholangiocarcinoma through PPAR $\alpha$**

Elisa Manieri, Cintia Folgueira, María Elena Rodríguez, Luis Leiva-Vega, Laura Esteban-Lafuente, Chaobo Chen, Francisco Javier Cubero, Tamera Barrett, Julie Cavanagh-Kyros, Davide Seruggia, Cintia Folgueira, Alejandro Rosell, Fátima Sanchez-Cabo, Manuel Jose Gómez, Maria J. Monte, Jose J.G. Marin, Roger J. Davis, Alfonso Mora, and Guadalupe Sabio.

Corresponding author: Roger J. Davis, Alfonso Mora or Guadalupe Sabio.

Email: [roger.davis@umassmed.edu](mailto:roger.davis@umassmed.edu), [amora@cnic.es](mailto:amora@cnic.es), or [guadalupe.sabio@cnic.es](mailto:guadalupe.sabio@cnic.es).

**This PDF file includes:**

Figures S1 – S2  
Tables S1 – S2

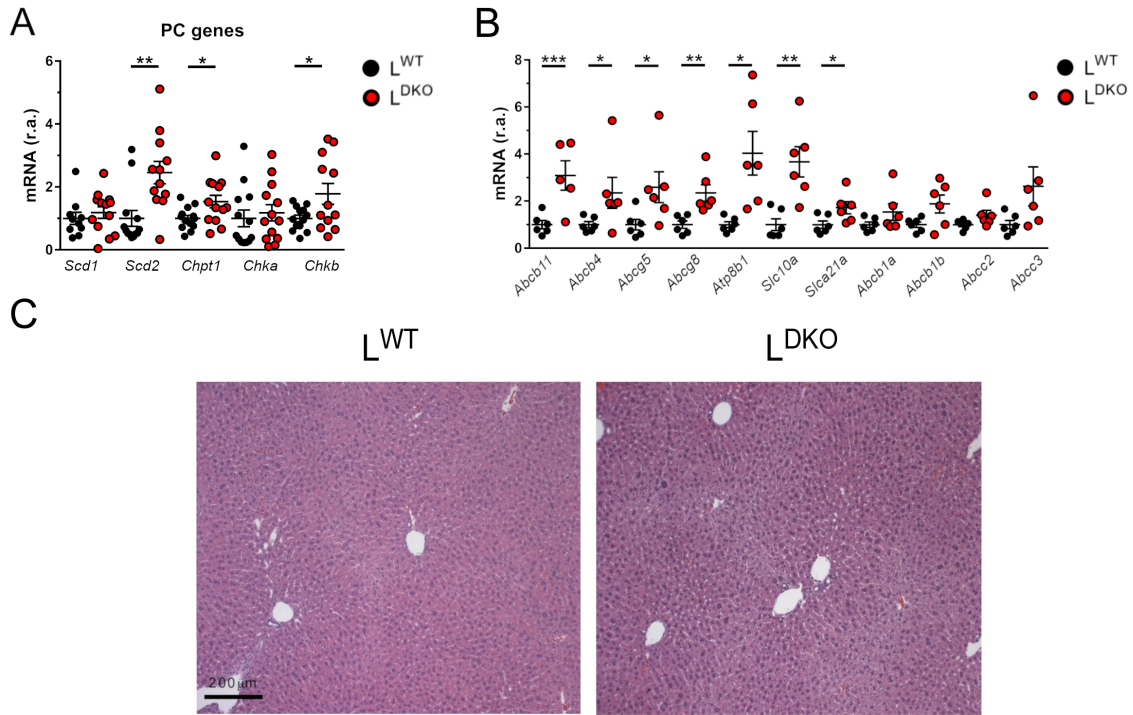

**Fig. S1. Effects of Hepatic JNK-deficiency liver.** L<sup>DKO</sup> and L<sup>WT</sup> mice (age 4 months) were fasted overnight prior to removal of the liver. **(A)**, **(B)** The expression of genes related to phosphatidylcholine (PC) synthesis, hepatocyte-mediated transport of PC and BA was measured by quantitative RT-PCR. (mean  $\pm$  SEM; n = 6-12). Gene expression was normalized to the amount of 18S RNA in each sample. Student's t test differences between L<sup>DKO</sup> and L<sup>WT</sup> are indicated (\*, P < 0.05; \*\*, P < 0.01). **(C)** Representative liver sections stained with hematoxylin and eosin (H&E). Scale bar = 200  $\mu$ m.

**A**

| Ingenuity Canonical Pathways | $-\log(\text{B-H p-value})$ |
|------------------------------|-----------------------------|
| FXR/RXR Activation           | 3.63                        |
| LXR/RXR Activation           | 2.34                        |
| PXR/RXR Activation           | 1.9                         |

  

| Upstream Regulator                                  | Expr Log Ratio | Z-score | p-value of overlap |
|-----------------------------------------------------|----------------|---------|--------------------|
| PPARA                                               | 0.393          | 1.576   | 0.000000001        |
| RXR                                                 | 0.04           | 2.328   | 0.000022           |
| PPARGC1A                                            | 0.299          | 1.986   | 0.0000231          |
| HNF4A                                               | 0.02           | 2.134   | 0.000142           |
| NCOR-LXR-Oxysterol-RXR-9 cis RA                     |                | 1.633   | 0.000623           |
| PPARG1B                                             | 0.298          | 1.245   | 0.00492            |
| RAR ligand-RAR $\alpha$ -Retinoic acid-RXR $\alpha$ |                |         | 0.00921            |
| FXR ligand-FXR-Retinoic acid-RXR $\alpha$           | 0.045          |         | 0.0406             |

**B**

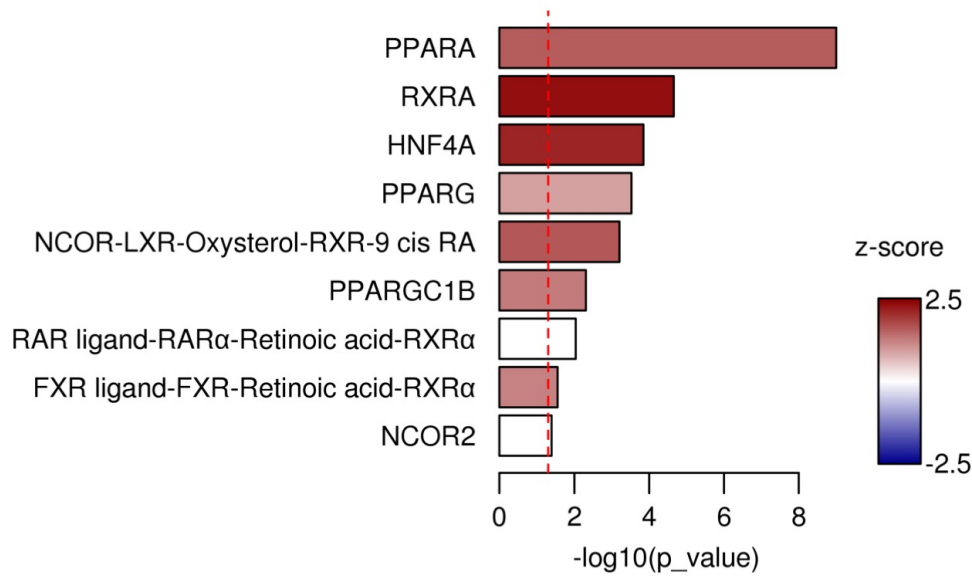

**Fig. S2. Pathway analysis of hepatic RNA-seq data obtained from L<sup>WT</sup> and L<sup>DKO</sup> mice.** RNA-Seq data (GEO: GSE55190) were examined using Ingenuity pathway analysis software (<http://ingenuity.com>) to identify canonical pathways and upstream regulators enriched in the set of hepatic genes differentially expressed between L<sup>WT</sup> and L<sup>DKO</sup> mice. **(A)** Enriched canonical pathways and upstream regulators related with the BA synthesis and homeostasis are presented. **(B)** Enriched upstream regulators are presented.

**TABLE S1. Taqman® assays probes – Related to RT-qPCR**

| <b>Gene ID</b> | <b>Gene Name</b>                                         | <b>Probe ID (Applied Biosystems)</b> |
|----------------|----------------------------------------------------------|--------------------------------------|
| <i>Abcb11</i>  | ATP-binding cassette, sub-family B (MDR/TAP) , member 11 | Mm00445168_m1                        |
| <i>Abcb1a</i>  | ATP-binding cassette, sub-family B (MDR/TAP)             | member 1A Mm00440761_m1              |
| <i>Abcb1b</i>  | ATP-binding cassette, sub-family B (MDR/TAP) member 1A   | Mm01324120_m1                        |
| <i>Abcc2</i>   | ATP-binding cassette, sub-family C (CFTR/MRP), member 2  | Mm00496899_m1                        |
| <i>Abcc3</i>   | ATP-binding cassette, sub-family C (CFTR/MRP), member 3  | Mm00551550_m1                        |
| <i>Abcc4</i>   | binding cassette, sub-family C (CFTR/MRP), member 4      | Mm01226380_m1                        |
| <i>Atp8b1</i>  | ATPase, class I, type 8B, member 1                       | Mm01257688_m1                        |
| <i>Baat</i>    | bile acid-Coenzyme A: amino acid N-acyltransferase       | Mm00476075_m1                        |
| <i>Bmp4</i>    | bone morphogenetic protein 4                             | Mm00432087_m1                        |
| <i>Cd68</i>    | CD68                                                     | Mm00839636_g1                        |
| <i>Chka</i>    | choline kinase alpha                                     | Mm00442760_m1                        |
| <i>Chkb</i>    | choline kinase beta                                      | Mm00432498_m1                        |
| <i>Chpt1</i>   | choline phosphotransferase 1                             | Mm00522694_m1                        |
| <i>Cpt1</i>    | choline-phosphotransferase                               | Mm00550438_m1                        |
| <i>Cyp27a</i>  | cytochrome P450, family 27, subfamily a, polypeptide 1   | Mm00470430_m1                        |
| <i>Cyp7a1</i>  | cytochrome P450, family 7, subfamily a, polypeptide 1    | Mm00484152_m1                        |
| <i>Cyp7b1</i>  | cytochrome P450, family 7, subfamily b, polypeptide 1    | Mm00484157_m1                        |
| <i>Cyp8b1</i>  | cytochrome P450, family 8, subfamily b, polypeptide 1    | Mm00501637_s1                        |
| <i>Gpbar1</i>  | G protein-coupled bile acid receptor 1 (TGR5)            | Mm00558112_s1                        |

|                |                                                                           |               |
|----------------|---------------------------------------------------------------------------|---------------|
| <i>Hmgcr</i>   | 3-hydroxy-3-methylglutaryl-Coenzyme A reductase                           | Mm01282501_m1 |
| <i>Hmgcs1</i>  | 3-hydroxy-3-methylglutaryl-Coenzyme A synthase                            | Mm00524111_m1 |
| <i>Ifng</i>    | Interferon gamma                                                          | Mm00801778_m1 |
| <i>Scd1</i>    | stearoyl-Coenzyme A desaturase 1                                          | Mm00772290_m1 |
| <i>Scd2</i>    | stearoyl-Coenzyme A desaturase 2                                          | Mm01208542_m1 |
| <i>Shh</i>     | sonic hedgehog                                                            | Mm00436528_m1 |
| <i>Slc10a1</i> | solute carrier family 10 (sodium/bile acid cotransporter family) member 1 | Mm00441421_m1 |
| <i>Slc10a2</i> | solute carrier family 10, member 2                                        | Mm00488258_m1 |
| <i>Smo</i>     | smoothened homolog                                                        | Mm01162710_m1 |
| <i>Tnf</i>     | Tumor necrosis factor                                                     | Mm00443258_m1 |

TABLE S2. qPCR primers - Related to RT-qPCR

| GENE             | Forward Primer           | Reverse Primer                 |
|------------------|--------------------------|--------------------------------|
| <i>Abcb11</i>    | TCTGACTCAGTGATTCTTCGCA   | CCCATAAACATCAGCCAGTTGT         |
| <i>Abcb4</i>     | CAGCGAGAAACGGAACAGCA     | TCAGAGTATCGGAACAGTGTCA         |
| <i>Abcg5</i>     | AGGGCCTCACATCAACAGAG     | GCTGACGCTGTAGGACACAT           |
| <i>Abgc8</i>     | GTAGCTGATGCCGATGACAA     | GGGGCTGATGCAGATTCA             |
| <i>Actb</i>      | GGCTGTATTCCCCTCCATCG     | CCAGTTGGTAACAATGCCATGT         |
| <i>Baat</i>      | AGGTAAAGGAAAGCCGCATC     | AGTCAATGACCCCTGGAAAA           |
| <i>Cyp7a</i>     | GTCCGGATATTCAAGGATGCA    | AGCAACTAAACAACCTGCCAGTACT<br>A |
| <i>Cyp7b1</i>    | AATTGGACAGCTTGGTCTGC     | TTCTCGGATGATGCTGGAGT           |
| <i>Cyp8b1</i>    | CAGGAAGTTCCGTCGATTTG     | GGCCCCAGTAGGGAGTAGAC           |
| <i>Cyp27a1</i>   | CCTCACCTATGGGATCTTCATC   | TTTAAGGCATCCGTGTAGAGC          |
| <i>Elane</i>     | AGCAGTCCATTGTGTGAACGG    | CACAGCCTCCTCGGATGAAG           |
| <i>f4/80</i>     | CCCCAGTGTCCTTACAGAGTG    | GTGCCCAGAGTGGATGTCT            |
| <i>Fgfr4</i>     | TTGGCCCTGTTGAGCATCTTT    | GCCCTCTTTGTACCAGTGACG          |
| <i>Foxm1</i>     | CTGATTCTCAAAAGACGGAGGC   | TTGATAATCTTGATTCCGGCTGG        |
| <i>FxR</i>       | GCTTGATGTGCTACAAAAGCTG   | CGTGGTGATGGTTGAATGTCC          |
| <i>FxRb</i>      | ACTCTCAGAGGTATCAGTCTCTGC | CAGAGGTTGAGTCTTTCCAC           |
| <i>Gapdh</i>     | TGAAGCAGGCATCTGAGGG      | CGAAGGTGGAAGAGTGGGA            |
| <i>Hmgcr</i>     | AGCTTGCCCGAATTGTATGTG    | TCTGTTGTGAACCATGTGACTTC        |
| <i>Hmgcs1</i>    | CAGGGTCTGATCCCCTTTG      | GCAACGATTCCCACATCTTT           |
| <i>Il10</i>      | GCTCTTACTGACTGGCATGAG    | CGCAGCTCTAGGAGCATGTG           |
| <i>Lyz2</i>      | ATGGAATGGCTGGCTACTATGG   | ACCAGTATCGGCTATTGATCTGA        |
| <i>Nr5a2/LRH</i> | TGAGGAACAACCTCCGGGAAAA   | CAGACACTTTATCGCCACACA          |

|                    |                         |                       |
|--------------------|-------------------------|-----------------------|
| <i>Shp</i>         | TGGGTCCCAAGGAGTATGC     | GCTCCAAGACTTCACACAGTG |
| <i>Gpbar1/TGR5</i> | GCTAGGGCTCTCACCTGGA     | CCCCAACACAGCAAGAAGAG  |
| <i>Tnf</i>         | CCCTCACACTCAGATCATCTTCT | GCTACGACGTGGGCTACAG   |

Figure 3D

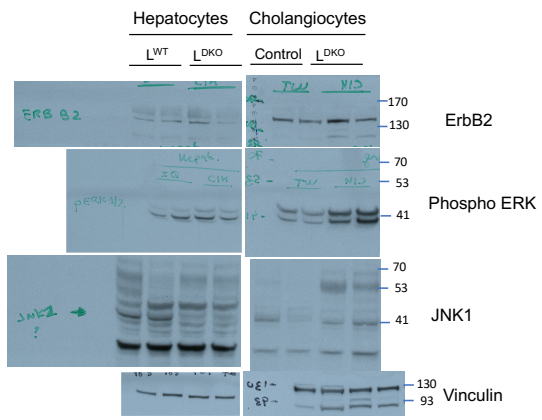

Figure 5E

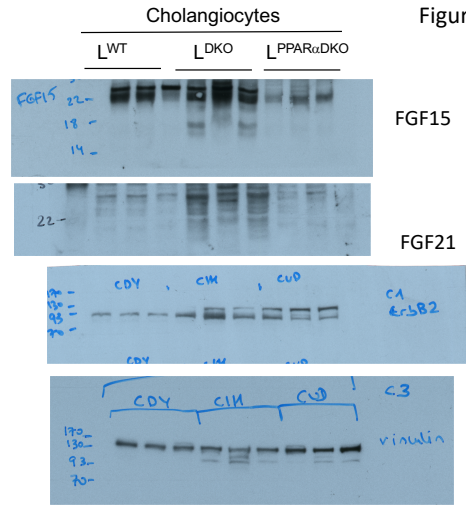

Supplement: pnas.2002672117.sapp.pdf [file pnas.2002672117.sapp.pdf]
